# Supplementary material for: Mineral Composition of Dietary Supplements-Analytical and Chemometric Approach
Source: MDPI journal article supplement (doi:10.3390/nu14010106), 2021-12-27
Supplement: s1 [file s1]

**Table S1.** The average recovery for the most of the elements to be determined (\*value obtained for information value).

| Analyte | Recovery (%) |             |             |            |
|---------|--------------|-------------|-------------|------------|
|         | M-4 CormTis  | M-3 HerTis  | M-5 CodTis  | DOLT-4     |
| Na      | 101.8 ± 4.9  | 99.8 ± 9.6  | 107 ± 12    | -          |
| K       | 89.2 ± 2.1   | 105 ± 11    | 105 ± 11    | -          |
| P       | 84.5 ± 3.9   | 86.2 ± 4.1  | 87.6 ± 6.0  | -          |
| Fe      | 112.9 ± 4.8  | 104 ± 10    | 97.5 ± 6.1  | 94.6 ± 9.7 |
| Ca      | 99.7 ± 8.1*  | -           | -           | -          |
| As      | 89.7 ± 6.3   | 85.1 ± 4.0  | 87.9 ± 6.3  | 85.2 ± 4.9 |
| Se      | 83.9 ± 1.4   | 96.8 ± 9.7  | 90.4 ± 4.9  | 86.2 ± 5.4 |
| Zn      | 102.1 ± 5.6  | 93.5 ± 7.4  | 110.1 ± 6.9 | 96.3 ± 3.7 |
| Cd      | 94.0 ± 7.8   | 90.2 ± 3.9  | -           | 87.8 ± 5.9 |
| Mg      | 98.4 ± 5.7   | 107.9 ± 6.1 | 97.5 ± 8.4  | -          |
| Pb      | 94.4 ± 6.1   | 88.7 ± 6.5  | -           | 92.0 ± 7.3 |
| Cu      | 94.8 ± 8.1   | 93.1 ± 8.1  | 86.2 ± 5.1  | 91.2 ± 6.4 |
| Ag      | -            | 87.6 ± 3.8  | -           | -          |
| Co      | 95.7 ± 7.1   | 87.0 ± 5.1  | -           | -          |
| Ni      | -            | 84.9 ± 3.7  | -           | 86.3 ± 4.7 |
| Mo      | -            | 85.0 ± 3.0  | -           | -          |
| Al      | -            | -           | -           | -          |
| Mn      | 88.9 ± 5.3   | 98.0 ± 2.7  | 95.2 ± 5.9  | -          |
| Sr      | 90.7 ± 7.0   | -           | 88.7 ± 7.0  | -          |
| Cr      | -            | 100.1 ± 6.9 | -           | 93.7 ± 6.3 |
| Ba      | -            | 87.6 ± 5.0  | 90.1 ± 8.4  | -          |
| Li      | -            | 88.6 ± 3.4  | -           | -          |

**Table S2.** Results of the determination of the selected elements' content in conventional and organic beetroot samples ( $x_m \pm U$ , ( $k = 2$ )).

| Type         | No. | Sample | Concentration (Conti) $\pm U$ (mg/100 g f.w.) |                      |                     |                     |                     |                          |                      |                        |                          |                        |                          |                          |                        |                      |                        |
|--------------|-----|--------|-----------------------------------------------|----------------------|---------------------|---------------------|---------------------|--------------------------|----------------------|------------------------|--------------------------|------------------------|--------------------------|--------------------------|------------------------|----------------------|------------------------|
|              |     |        | Na                                            | K                    | P                   | Mg                  | Ca                  | Fe                       | Se                   | Zn                     | Cu                       | Mn                     | Sr                       | Ba                       | Al                     | As                   | Cd                     |
| conventional | 1.  | 1Bo    | 51.64<br>$\pm 0.53$                           | 263.32<br>$\pm 0.79$ | 28.48<br>$\pm 0.18$ | 24.47<br>$\pm 0.20$ | 25.54<br>$\pm 0.41$ | 0.6971<br>$\pm 0.0039$   | <LOQ                 | <LOQ                   | 0.08166<br>$\pm 0.00080$ | 1.640<br>$\pm 0.013$   | 0.10518<br>$\pm 0.00056$ | 0.15049<br>$\pm 0.00062$ | 0.4588<br>$\pm 0.0018$ | 3.246<br>$\pm 0.090$ | <LOQ                   |
|              | 2.  | 3Bo    | 18.539<br>$\pm 0.050$                         | 214.63<br>$\pm 0.94$ | 19.19<br>$\pm 0.21$ | 15.84<br>$\pm 0.13$ | 22.23<br>$\pm 0.97$ | 0.7124<br>$\pm 0.0031$   | 0.541<br>$\pm 0.064$ | 0.4075<br>$\pm 0.0043$ | 0.1058<br>$\pm 0.0010$   | 0.174<br>$\pm 0.016$   | 0.1782<br>$\pm 0.0010$   | 0.2483<br>$\pm 0.0016$   | 0.6573<br>$\pm 0.0092$ | <LOQ                 | <LOQ                   |
|              | 3.  | 4Bo    | 46.28<br>$\pm 0.15$                           | 291.5<br>$\pm 1.94$  | 16.37<br>$\pm 0.33$ | 26.64<br>$\pm 0.22$ | 21.68<br>$\pm 0.18$ | 0.8263<br>$\pm 0.0042$   | <LOQ                 | <LOQ                   | <LOQ                     | 0.250<br>$\pm 0.0031$  | 0.13330<br>$\pm 0.00056$ | 0.12181<br>$\pm 0.00031$ | 0.8190<br>$\pm 0.0076$ | <LOQ                 | <LOQ                   |
|              | 4.  | 5Bo    | 24.84<br>$\pm 0.91$                           | 294.63<br>$\pm 0.57$ | 19.12<br>$\pm 0.52$ | 22.82<br>$\pm 0.12$ | 17.55<br>$\pm 0.40$ | 0.50106<br>$\pm 0.00042$ | <LOQ                 | 0.353<br>$\pm 0.0016$  | 0.10370<br>$\pm 0.00087$ | 0.2433<br>$\pm 0.0022$ | 0.13402<br>$\pm 0.00027$ | 0.17946<br>$\pm 0.00039$ | <LOQ                   | <LOQ                 | 0.0639<br>$\pm 0.0010$ |
| organic      | 5.  | 2Bo    | 61.04<br>$\pm 0.57$                           | 527.3<br>$\pm 1.36$  | 38.09<br>$\pm 0.10$ | 38.31<br>$\pm 0.20$ | 51.05<br>$\pm 0.41$ | 0.883<br>$\pm 0.055$     | <LOQ                 | <LOQ                   | <LOQ                     | 0.4227<br>$\pm 0.0041$ | 0.5003<br>$\pm 0.0030$   | 0.22311<br>$\pm 0.00073$ | 1.905<br>$\pm 0.020$   | 3.684<br>$\pm 0.095$ | <LOQ                   |
|              | 6.  | 6Bo    | 16.54<br>$\pm 0.10$                           | 260.6<br>$\pm 1.54$  | 36.97<br>$\pm 0.30$ | 23.73<br>$\pm 0.15$ | 25.38<br>$\pm 0.43$ | 0.698<br>$\pm 0.071$     | <LOQ                 | <LOQ                   | <LOQ                     | 0.2460<br>$\pm 0.0026$ | 0.0934<br>$\pm 0.0026$   | 0.19275<br>$\pm 0.0016$  | 0.2265<br>$\pm 0.0035$ | <LOQ                 | <LOQ                   |
|              | 7.  | 7Bo    | 19.05<br>$\pm 0.22$                           | 279.3<br>$\pm 1.0$   | 37.56<br>$\pm 0.22$ | 28.64<br>$\pm 0.18$ | 26.82<br>$\pm 0.15$ | 0.8766<br>$\pm 0.0028$   | <LOQ                 | <LOQ                   | <LOQ                     | 0.4062<br>$\pm 0.0022$ | 0.1153<br>$\pm 0.0030$   | 0.23533<br>$\pm 0.00092$ | 0.4066<br>$\pm 0.0094$ | <LOQ                 | <LOQ                   |

LOQ Se=0.30  $\mu\text{g/g}$ , LOQ Zn=0.96  $\mu\text{g/g}$ , LOQ Cu=0.21  $\mu\text{g/g}$ , LOQ Al=0.81  $\mu\text{g/g}$ , LOQ As=0.30  $\mu\text{g/g}$ , LOQ Cd=0.69  $\mu\text{g/g}$ ; U – expanded uncertainty of measurement at 95% confidence level obtained for three replicates

**Table S3.** Results of the determination of the content of selected elements in beetroot-based food supplements samples ( $\bar{x}_m \pm U$ , ( $k = 2$ )).

| Form     | No. | Sample | Concentration $\pm U$ ( $\mu\text{g/d.u. of product}$ ) |                         |                       |                       |                        |                       |                      |                       |                        |                      |                     |                        |
|----------|-----|--------|---------------------------------------------------------|-------------------------|-----------------------|-----------------------|------------------------|-----------------------|----------------------|-----------------------|------------------------|----------------------|---------------------|------------------------|
|          |     |        | Na                                                      | K                       | P                     | Mg                    | Ca                     | Fe                    | Zn                   | Mn                    | Sr                     | Al                   | As                  | Cd                     |
| capsules | 1.  | 1GyA   | 302.94<br>$\pm 4.35$                                    | 679.50<br>$\pm 4.35$    | <LOQ                  | 107.64<br>$\pm 0.45$  | 218.15<br>$\pm 0.60$   | 19.91<br>$\pm 0.032$  | <LOQ                 | <LOQ                  | <LOQ                   | 8.75<br>$\pm 0.28$   | <LOQ                | 61.17<br>$\pm 0.46$    |
|          | 2.  | 1GyB   | 328.55<br>$\pm 3.75$                                    | 698.0<br>$\pm 0.024$    | <LOQ                  | 112.17<br>$\pm 0.33$  | 192.90<br>$\pm 1.85$   | 18.75<br>$\pm 0.022$  | <LOQ                 | <LOQ                  | <LOQ                   | 17.38<br>$\pm 0.25$  | 93.90<br>$\pm 3.40$ | <LOQ                   |
|          | 3.  | 2PhA   | 323.65<br>$\pm 4.35$                                    | 690.950<br>$\pm 0.024$  | <LOQ                  | 109.10<br>$\pm 0.35$  | 192.60<br>$\pm 2.10$   | 18.48<br>$\pm 0.075$  | <LOQ                 | <LOQ                  | <LOQ                   | 20.61<br>$\pm 0.25$  | 95.0<br>$\pm 1.10$  | <LOQ                   |
|          | 4.  | 2PhB   | 317.0<br>$\pm 5.50$                                     | 700.950<br>$\pm 0.024$  | <LOQ                  | 111.10<br>$\pm 0.40$  | 188.70<br>$\pm 1.70$   | 18.32<br>$\pm 0.15$   | <LOQ                 | <LOQ                  | <LOQ                   | 11.31<br>$\pm 0.14$  | 92.70<br>$\pm 2.15$ | <LOQ                   |
|          | 5.  | 3GaA   | 474.36<br>$\pm 2.26$                                    | 5409.296<br>$\pm 0.029$ | 660<br>$\pm 15$       | 488.06<br>$\pm 2.21$  | 488.72<br>$\pm 1.55$   | 2797.0<br>$\pm 2.32$  | 3.880<br>$\pm 0.089$ | 19.751<br>$\pm 0.066$ | 2.724<br>$\pm 0.024$   | 221.65<br>$\pm 2.92$ | <LOQ                | 3.302<br>$\pm 0.032$   |
|          | 6.  | 3GaB   | 477.63<br>$\pm 2.03$                                    | 5206.060<br>$\pm 0.029$ | 862.41<br>$\pm 5.96$  | 487.23<br>$\pm 2.26$  | 520.61<br>$\pm 2.26$   | 2720<br>$\pm 12$      | <LOQ                 | 19.38<br>$\pm 0.15$   | 3.041<br>$\pm 0.027$   | 226.54<br>$\pm 0.72$ | <LOQ                | <LOQ                   |
|          | 7.  | 6HeA   | 464.36<br>$\pm 4.42$                                    | 4948.450<br>$\pm 0.031$ | 952.97<br>$\pm 1.17$  | 971.43<br>$\pm 5.59$  | 464.82<br>$\pm 2.99$   | 1275.30<br>$\pm 7.80$ | <LOQ                 | 14.869<br>$\pm 0.051$ | <LOQ                   | 6.58<br>$\pm 0.25$   | <LOQ                | <LOQ                   |
|          | 8.  | 6HeB   | 577.20<br>$\pm 6.50$                                    | 5943.080<br>$\pm 0.031$ | 855<br>$\pm 21$       | 1297.01<br>$\pm 2.60$ | 543.99<br>$\pm 2.21$   | 2945<br>$\pm 18$      | 4.53<br>$\pm 0.12$   | 14.235<br>$\pm 0.072$ | 3.239<br>$\pm 0.027$   | <LOQ                 | <LOQ                | 3.278<br>$\pm 0.042$   |
|          | 9.  | 9SoA   | 6040<br>$\pm 37$                                        | 5161.890<br>$\pm 0.033$ | <LOQ                  | 194.85<br>$\pm 0.69$  | 203.76<br>$\pm 1.24$   | 203.78<br>$\pm 0.51$  | <LOQ                 | <LOQ                  | <LOQ                   | 5.24<br>$\pm 0.15$   | <LOQ                | <LOQ                   |
|          | 10. | 9SoB   | 6947<br>$\pm 10$                                        | 5663.520<br>$\pm 0.033$ | 1023.96<br>$\pm 8.28$ | 225.35<br>$\pm 1.52$  | 287.52<br>$\pm 0.61$   | 18.22<br>$\pm 0.17$   | <LOQ                 | <LOQ                  | <LOQ                   | 14.80<br>$\pm 0.083$ | <LOQ                | <LOQ                   |
| tablets  | 11. | 4HeA   | 287.26<br>$\pm 6.39$                                    | 2999.728<br>$\pm 0.018$ | 512<br>$\pm 11$       | 266.51<br>$\pm 1.65$  | 270.83<br>$\pm 1.17$   | 1492<br>$\pm 23$      | <LOQ                 | 11.22<br>$\pm 0.11$   | <LOQ                   | 3.83<br>$\pm 0.23$   | <LOQ                | <LOQ                   |
|          | 12. | 4HeB   | 336.90<br>$\pm 3.76$                                    | 3321.584<br>$\pm 0.018$ | 438.45<br>$\pm 1.28$  | 311.29<br>$\pm 0.79$  | 324.49<br>$\pm 5.26$   | 1576<br>$\pm 18$      | <LOQ                 | 12.34<br>$\pm 0.094$  | 1.9514<br>$\pm 0.0064$ | 136.90<br>$\pm 0.22$ | <LOQ                | 1.9037<br>$\pm 0.0094$ |
|          | 13. | 5BoA   | 774.95<br>$\pm 6.60$                                    | 5358.100<br>$\pm 0.027$ | 631.95<br>$\pm 9.90$  | 306.50<br>$\pm 0.30$  | 290.35<br>$\pm 0.99$   | 14.413<br>$\pm 0.030$ | <LOQ                 | 4.058<br>$\pm 0.014$  | <LOQ                   | 10.58<br>$\pm 0.46$  | <LOQ                | <LOQ                   |
|          | 14. | 5DoB   | 870<br>$\pm 10$                                         | 5777.20<br>$\pm 0.027$  | 722.70<br>$\pm 8.80$  | 616.28<br>$\pm 4.07$  | 421.262<br>$\pm 0.050$ | 15.752<br>$\pm 0.044$ | <LOQ                 | 4.472<br>$\pm 0.048$  | <LOQ                   | 4.862<br>$\pm 0.019$ | <LOQ                | <LOQ                   |
|          | 15. | 7CoA   | 1057<br>$\pm 16$                                        | 9009.50<br>$\pm 0.045$  | 1056<br>$\pm 10$      | 1922<br>$\pm 13$      | 687.83<br>$\pm 3.89$   | 41.656<br>$\pm 0.027$ | <LOQ                 | 18.65<br>$\pm 0.18$   | <LOQ                   | 18.32<br>$\pm 1.20$  | <LOQ                | <LOQ                   |
|          | 16. | 7CoB   | 1155.14<br>$\pm 4.16$                                   | 8865.20<br>$\pm 0.045$  | 979.95<br>$\pm 8.70$  | 1857<br>$\pm 13$      | 611.61<br>$\pm 3.61$   | 39.36<br>$\pm 0.17$   | <LOQ                 | 14.91<br>$\pm 0.10$   | <LOQ                   | 21.47<br>$\pm 0.29$  | <LOQ                | <LOQ                   |
|          | 17. | 8SwA   | 3275.94<br>$\pm 4.12$                                   | 2617.060<br>$\pm 0.069$ | <LOQ                  | 363.52<br>$\pm 1.99$  | 1771<br>$\pm 21$       | 20.79<br>$\pm 0.26$   | <LOQ                 | <LOQ                  | 2.330<br>$\pm 0.037$   | <LOQ                 | <LOQ                | 7.11<br>$\pm 0.16$     |

LOQ P=11  $\mu\text{g/g}$ , LOQ Zn=0.96  $\mu\text{g/g}$ , LOQ Mn=0.16  $\mu\text{g/g}$ , LOQ Sr=0.20  $\mu\text{g/g}$ , LOQ Al=0.81  $\mu\text{g/g}$ , LOQ As=0.30  $\mu\text{g/g}$ , LOQ Cd=0.69  $\mu\text{g/g}$ ; U – expanded uncertainty of measurement at 95% confidence level obtained for three replicates

**Table S4.** Results of the realisation of dietary recommendation (%) for selected elements by a 100 g portion of conventional and organic beetroot samples.

| Type         | No. | Sample | Realisation of Dietary Recommendation (%) |                   |                   |                       |                    |                      |                     |                      |                   |                      |
|--------------|-----|--------|-------------------------------------------|-------------------|-------------------|-----------------------|--------------------|----------------------|---------------------|----------------------|-------------------|----------------------|
|              |     |        | Na                                        | K                 | P                 | Mg                    | Ca                 | Fe                   | Se                  | Zn                   | Cu                | Mn                   |
|              |     |        | AI<br>1500 mg/day                         | AI<br>3500 mg/day | RDA<br>700 mg/day | RDA men<br>420 mg/day | RDA<br>1000 mg/day | RDA men<br>10 mg/day | RDA<br>0.055 mg/day | RDA men<br>11 mg/day | RDA<br>0.9 mg/day | AI men<br>2.3 mg/day |
| conventional | 1.  | 1Bo    | 3.44                                      | 7.52              | 4.07              | 5.83                  | 2.55               | 6.97                 | <LOQ                | <LOQ                 | 9.07              | 91.1                 |
|              | 2.  | 3Bo    | 1.24                                      | 6.13              | 2.74              | 3.77                  | 2.22               | 7.12                 | 983                 | 3.7                  | 11.8              | 9.69                 |
|              | 3.  | 4Bo    | 3.09                                      | 8.33              | 2.34              | 6.34                  | 2.17               | 8.26                 | <LOQ                | <LOQ                 | <LOQ              | 13.9                 |
|              | 4.  | 5Bo    | 1.66                                      | 8.42              | 2.73              | 5.43                  | 1.75               | 5.01                 | <LOQ                | 3.21                 | 11.5              | 13.5                 |
| organic      | 5.  | 2Bo    | 4.07                                      | 15.1              | 5.44              | 9.12                  | 5.10               | 8.83                 | <LOQ                | <LOQ                 | <LOQ              | 18.4                 |
|              | 6.  | 6Bo    | 1.10                                      | 7.44              | 5.28              | 5.65                  | 2.54               | 6.98                 | <LOQ                | <LOQ                 | <LOQ              | 10.7                 |
|              | 7.  | 7Bo    | 1.27                                      | 7.98              | 5.37              | 6.82                  | 2.68               | 8.77                 | <LOQ                | <LOQ                 | <LOQ              | 17.7                 |

LOQ P=11 µg/g, LOQ Se=0.30 µg/g, LOQ Zn=0.96 µg/g, LOQ Cu=0.21 µg/g; AI and RDA values according to Jarosz et al. [27]

**Table S5.** Results of the realisation of dietary recommendation (%) for selected elements by a daily portion of dietary supplements.

| Form     | No. | Sample | Realisation of Dietary Recommendation (%) |                   |                   |                       |                    |                      |                      |                      |
|----------|-----|--------|-------------------------------------------|-------------------|-------------------|-----------------------|--------------------|----------------------|----------------------|----------------------|
|          |     |        | Na                                        | K                 | P                 | Mg                    | Ca                 | Fe                   | Zn                   | Mn                   |
|          |     |        | AI<br>1500 mg/day                         | AI<br>3500 mg/day | RDA<br>700 mg/day | RDA men<br>420 mg/day | RDA<br>1000 mg/day | RDA men<br>10 mg/day | RDA men<br>11 mg/day | AI men<br>2.3 mg/day |
| capsules | 1.  | 1GyA   | 0.02                                      | 0.02              | <LOQ              | 0.03                  | 0.02               | 0.20                 | <LOQ                 | <LOQ                 |
|          | 2.  | 1GyB   | 0.02                                      | 0.02              | <LOQ              | 0.03                  | 0.02               | 0.19                 | <LOQ                 | <LOQ                 |
|          | 3.  | 2PhA   | 0.02                                      | 0.02              | <LOQ              | 0.03                  | 0.02               | 0.18                 | <LOQ                 | <LOQ                 |
|          | 4.  | 2PhB   | 0.02                                      | 0.02              | <LOQ              | 0.03                  | 0.02               | 0.18                 | <LOQ                 | <LOQ                 |
|          | 5.  | 3GaA   | 0.06                                      | 0.31              | 0.19              | 0.23                  | 0.10               | 55.9                 | 0.07                 | 1.72                 |
|          | 6.  | 3GaB   | 0.06                                      | 0.30              | 0.25              | 0.23                  | 0.10               | 54.4                 | <LOQ                 | 1.69                 |
|          | 7.  | 6HeA   | 0.09                                      | 0.42              | 0.41              | 0.69                  | 0.14               | 38.3                 | <LOQ                 | 1.94                 |
|          | 8.  | 6HeB   | 0.12                                      | 0.51              | 0.37              | 0.93                  | 0.16               | 88.4                 | 0.12                 | 1.86                 |
|          | 9.  | 9SoA   | 0.81                                      | 0.29              | <LOQ              | 0.09                  | 0.04               | 4.08                 | <LOQ                 | <LOQ                 |
|          | 10. | 9SoB   | 0.93                                      | 0.32              | 0.29              | 0.11                  | 0.06               | 0.36                 | <LOQ                 | <LOQ                 |
| tablets  | 11. | 4HeA   | 0.06                                      | 0.26              | 0.22              | 0.19                  | 0.08               | 44.7                 | <LOQ                 | 1.46                 |
|          | 12. | 4HeB   | 0.07                                      | 0.28              | 0.19              | 0.22                  | 0.10               | 47.3                 | <LOQ                 | 1.61                 |
|          | 13. | 5BoA   | 0.31                                      | 0.92              | 0.54              | 0.44                  | 0.17               | 0.86                 | <LOQ                 | 1.06                 |
|          | 14. | 5DoB   | 0.35                                      | 0.99              | 0.62              | 0.88                  | 0.25               | 0.95                 | <LOQ                 | 1.17                 |
|          | 15. | 7CoA   | 0.42                                      | 1.54              | 0.91              | 2.75                  | 0.41               | 2.50                 | <LOQ                 | 4.86                 |
|          | 16. | 7CoB   | 0.46                                      | 1.52              | 0.84              | 2.65                  | 0.37               | 2.36                 | <LOQ                 | 3.89                 |
|          | 17. | 8SwA   | 0.44                                      | 0.15              | <LOQ              | 0.17                  | 0.35               | 0.42                 | <LOQ                 | <LOQ                 |

LOQ P=11 µg/g, LOQ Zn=0.96 µg/g, LOQ Mn=0.16 µg/g; AI and RDA values according to Jarosz et al. [27]

**Table S6.** Spearman's rank correlation of beetroot and dietary supplements samples (red font for statistically significant correlations).

|    | Na                      | K                       | P                       | Fe                      | Ca                      | Mg                      | Al                     | Mn                      | Sr                      | Ba                      |
|----|-------------------------|-------------------------|-------------------------|-------------------------|-------------------------|-------------------------|------------------------|-------------------------|-------------------------|-------------------------|
| Na | 1.000000                | 0.604376 <sup>abc</sup> | 0.457918 <sup>ab</sup>  | -0.059202               | 0.516345 <sup>ab</sup>  | 0.459717 <sup>ab</sup>  | 0.053445               | 0.259625                | 0.479073 <sup>ab</sup>  | 0.396698 <sup>a</sup>   |
| K  | 0.604376 <sup>abc</sup> | 1.000000                | 0.679524 <sup>abc</sup> | 0.159588                | 0.867954 <sup>abc</sup> | 0.811326 <sup>abc</sup> | 0.250097               | 0.587449 <sup>abc</sup> | 0.858606 <sup>abc</sup> | 0.787954 <sup>abc</sup> |
| P  | 0.457918 <sup>ab</sup>  | 0.679524 <sup>abc</sup> | 1.000000                | 0.396260 <sup>a</sup>   | 0.646503 <sup>abc</sup> | 0.654371 <sup>abc</sup> | 0.179348               | 0.618034 <sup>abc</sup> | 0.565329 <sup>abc</sup> | 0.594346 <sup>abc</sup> |
| Fe | -0.059202               | 0.159588                | 0.396260 <sup>ab</sup>  | 1.000000                | 0.340026 <sup>a</sup>   | 0.458430 <sup>ab</sup>  | 0.380554 <sup>a</sup>  | 0.719974 <sup>abc</sup> | 0.249831                | 0.217395                |
| Ca | 0.516345 <sup>ab</sup>  | 0.867954 <sup>abc</sup> | 0.646503 <sup>abc</sup> | 0.340026 <sup>ab</sup>  | 1.000000                | 0.831918 <sup>abc</sup> | 0.429105 <sup>ab</sup> | 0.722557 <sup>abc</sup> | 0.895982 <sup>abc</sup> | 0.856791 <sup>abc</sup> |
| Mg | 0.459717 <sup>ab</sup>  | 0.811326 <sup>abc</sup> | 0.654371 <sup>abc</sup> | 0.458430 <sup>ab</sup>  | 0.831918 <sup>abc</sup> | 1.000000                | 0.334321 <sup>a</sup>  | 0.758207 <sup>abc</sup> | 0.697167 <sup>abc</sup> | 0.787137 <sup>abc</sup> |
| Al | 0.053445                | 0.250097                | 0.179348                | 0.380554 <sup>a</sup>   | 0.429105 <sup>ab</sup>  | 0.334321 <sup>a</sup>   | 1.000000               | 0.465686 <sup>ab</sup>  | 0.396772 <sup>a</sup>   | 0.406891 <sup>a</sup>   |
| Mn | 0.259625                | 0.587449 <sup>abc</sup> | 0.618034 <sup>abc</sup> | 0.719974 <sup>abc</sup> | 0.722557 <sup>abc</sup> | 0.758207 <sup>abc</sup> | 0.465686 <sup>ab</sup> | 1.000000                | 0.535431 <sup>abc</sup> | 0.575084 <sup>abc</sup> |
| Sr | 0.479073 <sup>ab</sup>  | 0.858606 <sup>abc</sup> | 0.565329 <sup>abc</sup> | 0.249831                | 0.895982 <sup>abc</sup> | 0.697167 <sup>abc</sup> | 0.396772 <sup>a</sup>  | 0.535431 <sup>abc</sup> | 1.000000                | 0.836054 <sup>abc</sup> |
| Ba | 0.396698 <sup>a</sup>   | 0.787954 <sup>abc</sup> | 0.594346 <sup>abc</sup> | 0.217395                | 0.856791 <sup>abc</sup> | 0.787137 <sup>abc</sup> | 0.406891 <sup>a</sup>  | 0.575084 <sup>abc</sup> | 0.836054 <sup>abc</sup> | 1.000000                |

a =  $p < 0.05$ ; b =  $p < 0.01$ ; c =  $p < 0.001$ **Table S7.** Spearman's rank correlation of beetroot samples (red font for statistically significant correlations).

|    | Na                     | K                      | P                     | Fe                      | Ca                      | Mg                      | Al                      | Mn                      | Sr                     | Ba                      |
|----|------------------------|------------------------|-----------------------|-------------------------|-------------------------|-------------------------|-------------------------|-------------------------|------------------------|-------------------------|
| Na | 1.000000               | 0.670175 <sup>ab</sup> | 0.238596              | 0.366667                | 0.642105 <sup>ab</sup>  | 0.449123                | 0.328214                | 0.563158 <sup>a</sup>   | 0.464239 <sup>a</sup>  | -0.045614               |
| K  | 0.670175 <sup>ab</sup> | 1.000000               | 0.278947              | 0.222807                | 0.526316 <sup>a</sup>   | 0.461404 <sup>a</sup>   | 0.021062                | 0.319298                | 0.587977 <sup>ab</sup> | 0.010526                |
| P  | 0.238596               | 0.278947               | 1.000000              | 0.521053 <sup>a</sup>   | 0.400000                | 0.512281 <sup>a</sup>   | 0.188679                | 0.540351 <sup>a</sup>   | 0.021939               | 0.345614                |
| Fe | 0.366667               | 0.222807               | 0.521053 <sup>a</sup> | 1.000000                | 0.812281 <sup>abc</sup> | 0.891228 <sup>abc</sup> | 0.719614 <sup>abc</sup> | 0.696491 <sup>abc</sup> | 0.273804               | 0.743860 <sup>abc</sup> |
| Ca | 0.642105 <sup>ab</sup> | 0.526316 <sup>a</sup>  | 0.400000              | 0.812281 <sup>abc</sup> | 1.000000                | 0.812281 <sup>abc</sup> | 0.579201 <sup>ab</sup>  | 0.689474 <sup>ab</sup>  | 0.452830               | 0.440351                |
| Mg | 0.449123               | 0.461404 <sup>a</sup>  | 0.512281 <sup>a</sup> | 0.891228 <sup>abc</sup> | 0.812281 <sup>abc</sup> | 1.000000                | 0.564283 <sup>a</sup>   | 0.780702 <sup>abc</sup> | 0.300132               | 0.729825 <sup>abc</sup> |
| Al | 0.328214               | 0.021062               | 0.188679              | 0.719614 <sup>abc</sup> | 0.579201 <sup>ab</sup>  | 0.564283 <sup>a</sup>   | 1.000000                | 0.426503                | 0.214662               | 0.481790 <sup>a</sup>   |
| Mn | 0.563158 <sup>a</sup>  | 0.319298               | 0.540351 <sup>a</sup> | 0.696491 <sup>abc</sup> | 0.689474 <sup>ab</sup>  | 0.780702 <sup>abc</sup> | 0.426503                | 1.000000                | 0.004388               | 0.457895 <sup>a</sup>   |
| Sr | 0.464239 <sup>a</sup>  | 0.587977 <sup>ab</sup> | 0.021939              | 0.273804                | 0.452830                | 0.300132                | 0.214662                | 0.004388                | 1.000000               | 0.190434                |
| Ba | -0.045614              | 0.010526               | 0.345614              | 0.743860 <sup>abc</sup> | 0.440351                | 0.729825 <sup>abc</sup> | 0.481790 <sup>a</sup>   | 0.457895 <sup>a</sup>   | 0.190434               | 1.000000                |

a =  $p < 0.05$ ; b =  $p < 0.01$ ; c =  $p < 0.001$

**Table S8.** Spearman's rank correlation of dietary supplements samples (red font for statistically significant correlations).

|    | Na                    | K                       | P         | Fe                      | Ca                      | Mg                      | Al        | Mn                      | Sr                      |
|----|-----------------------|-------------------------|-----------|-------------------------|-------------------------|-------------------------|-----------|-------------------------|-------------------------|
| Na | 1.000000              | 0.556373 <sup>a</sup>   | 0.414424  | -0.272059               | 0.220588                | 0.350490                | -0.338443 | -0.045714               | 0.100360                |
| K  | 0.556373 <sup>a</sup> | 1.000000                | 0.392090  | 0.144608                | 0.465686                | 0.816176 <sup>abc</sup> | -0.036787 | 0.553649 <sup>a</sup>   | 0.164226                |
| P  | 0.414424              | 0.392090                | 1.000000  | 0.364792                | 0.201008                | 0.469019                | -0.172576 | 0.447421                | 0.107771                |
| Fe | -0.272059             | 0.144608                | 0.364792  | 1.000000                | 0.365196                | 0.453431                | 0.289393  | 0.787299 <sup>abc</sup> | 0.492677 <sup>a</sup>   |
| Ca | 0.220588              | 0.465686                | 0.201008  | 0.365196                | 1.000000                | 0.536765 <sup>a</sup>   | -0.025751 | 0.675554 <sup>ab</sup>  | 0.784633 <sup>abc</sup> |
| Mg | 0.350490              | 0.816176 <sup>abc</sup> | 0.469019  | 0.453431                | 0.536765 <sup>a</sup>   | 1.000000                | -0.068670 | 0.711109 <sup>ab</sup>  | 0.228091                |
| Al | -0.338443             | -0.036787               | -0.172576 | 0.289393                | -0.025751               | -0.068670               | 1.000000  | 0.289701                | 0.196279                |
| Mn | -0.045714             | 0.553649 <sup>a</sup>   | 0.447421  | 0.787299 <sup>abc</sup> | 0.675554 <sup>ab</sup>  | 0.711109 <sup>ab</sup>  | 0.289701  | 1.000000                | 0.537291 <sup>a</sup>   |
| Sr | 0.100360              | 0.164226                | 0.107771  | 0.492677 <sup>a</sup>   | 0.784633 <sup>abc</sup> | 0.228091                | 0.196279  | 0.537291 <sup>a</sup>   | 1.000000                |

a=  $p < 0.05$ ; b=  $p < 0.01$ ; c=  $p < 0.001$ **Table S9.** Relationships between the category of the analysed samples and the concentration of elements.

| Category                                                        | Na                  | K                   | P                   | Fe                  | Ca                  | Mg                  | Al     | Mn                  | Sr                  | Ba                  |
|-----------------------------------------------------------------|---------------------|---------------------|---------------------|---------------------|---------------------|---------------------|--------|---------------------|---------------------|---------------------|
| Form of the product (vegetable-beetroot and dietary supplement) | 9.767 <sup>b</sup>  | 25.968 <sup>c</sup> | 14.278 <sup>c</sup> | 21.392 <sup>c</sup> | 27.056 <sup>c</sup> | 18.034 <sup>c</sup> | 4.690  | 19.052 <sup>c</sup> | 28.157 <sup>c</sup> | 29.262 <sup>c</sup> |
| Origin of beetroot                                              | 17.765 <sup>a</sup> | 30.652 <sup>c</sup> | 20.193 <sup>b</sup> | 23.699 <sup>b</sup> | 28.856 <sup>c</sup> | 25.698 <sup>c</sup> | 11.337 | 24.358 <sup>b</sup> | 32.327 <sup>c</sup> | 30.927 <sup>c</sup> |
| Type of main component of dietary supplement                    | 2.451               | 7.010               | 7.584               | 12.647 <sup>a</sup> | 7.569               | 11.758 <sup>a</sup> | 5.804  | 14.368 <sup>b</sup> | 7.894 <sup>a</sup>  | -                   |

 $p < 0.05$  <sup>a</sup>;  $p < 0.01$  <sup>b</sup>;  $p < 0.001$  <sup>c</sup>**Table S10.** Results of the Dunn's test for all the analysed samples (beetroot and dietary supplements).

|                                 | Beetroot                                                                                                                                    | Dietary supplement enriched                                                                              | Dietary supplement non-enriched                                                                                                             |
|---------------------------------|---------------------------------------------------------------------------------------------------------------------------------------------|----------------------------------------------------------------------------------------------------------|---------------------------------------------------------------------------------------------------------------------------------------------|
| Beetroot                        | -                                                                                                                                           | Na <sup>b</sup> , K <sup>b</sup> , Fe <sup>a</sup> , Ca <sup>a</sup> , Sr <sup>b</sup> , Ba <sup>c</sup> | K <sup>c</sup> , P <sup>c</sup> , Fe <sup>a</sup> , Ca <sup>c</sup> , Mg <sup>c</sup> , Mn <sup>c</sup> , Sr <sup>c</sup> , Ba <sup>c</sup> |
| Dietary supplement enriched     | Na <sup>b</sup> , K <sup>b</sup> , Fe <sup>a</sup> , Ca <sup>a</sup> , Sr <sup>b</sup> , Ba <sup>c</sup>                                    | -                                                                                                        | Fe <sup>c</sup> , Mn <sup>b</sup>                                                                                                           |
| Dietary supplement non-enriched | K <sup>c</sup> , P <sup>c</sup> , Fe <sup>a</sup> , Ca <sup>c</sup> , Mg <sup>c</sup> , Mn <sup>c</sup> , Sr <sup>c</sup> , Ba <sup>c</sup> | Fe <sup>c</sup> , Mn <sup>b</sup>                                                                        | -                                                                                                                                           |

 $p < 0.05$  <sup>a</sup>;  $p < 0.01$  <sup>b</sup>;  $p < 0.001$  <sup>c</sup>
